# Supplementary material
Source: Elsevier journal article supplement (https://www.sciencedirect.com/science/article/pii/S0021755721000565)
Supplement: mmc1 [file S0021755721000565:mmc1.docx]

**Supplementary material Table S1.** Database search strategy.

| Database | Search (June 1st, 2020) |
| --- | --- |
| Embase | #1 = ("cholesterol ester storage" OR "Wolman disease" OR "Wolmans Disease" OR "Wolman's Disease" OR "Lysosomal acid lipase" OR "Acid Lipase Deficiency" OR "Familial Xanthomatosis" OR "LIPA deficiency" OR "LAL Deficiency" OR "LIPA mutation")  #2 = ("child" OR "children" OR "childhood" OR "preschool" OR "preschools" OR "pediatrics" OR "pediatric" OR "paediatrics" OR "paediatric" OR "infancy" OR "infant" OR "infants" OR "adolescent" OR "adolescents" OR "adolescence" OR "youth" OR "youths" OR "teenage" OR "teenager" OR "teenagers" OR "teen" OR "teens")  #4 = #1 AND #2 |
| LILACS | (tw:("cholesterol ester storage disease" OR "Wolman disease" OR "Wolmans Disease" OR "Wolman's Disease" OR "Lysosomal acid lipase" OR "Acid Lipase Deficiency" OR "Familial Xanthomatosis" OR "LIPA deficiency" OR "LAL Deficiency" OR "LIPA mutation" OR "Armazenamento de Colesterol Éster" OR "Doença de Wolman" OR "Deficiência da Hidrolase Ácida de Colesteril Éster Tipo Wolman" OR "Xantomatose Familiar" OR "Xantomatose de Wolman" OR "Xantomatose Familiar" OR "Lipidose Familiar de Wolman" OR "Enfermedad de Acumulación de Colesterol Éster" OR "Enfermedad de Wolman" OR "Colesteril Éster Hidrolasa Ácida Tipo Wolman" OR "Deficiencia de Hidrolasa Acida de Ésteres de Colesterol Tipo" OR "Enfermedad de Wolman" OR "Xantomatosis Familiar" OR "Xantomatosis de Wolman")) AND (tw:("child" OR "children" OR "childhood" OR "preschool" OR "preschools" OR "pediatrics" OR "pediatric" OR "paediatrics" OR "paediatric" OR "infancy" OR "infant" OR "infants" OR "adolescent" OR "adolescents" OR "adolescence" OR "youth" OR "youths" OR "teenage" OR "teenager" OR "teenagers" OR "teen" OR "teens" OR crianca* OR infancia OR infantil OR pediatri* OR "pre escolar" OR "pre escolares" OR "escolar" OR "escolares" OR jovem OR jovens OR adolescen* OR nino* OR "preescolar" OR jovene*)) AND (instance:"regional") AND ( db:("LILACS")) |
| LIVIVO | ("cholesterol ester storage" OR "Wolman disease" OR "Lysosomal acid lipase") AND ("child" OR "children" OR "childhood" OR "adolescent" OR "adolescents" OR "adolescence") |
| PubMed | (("cholesterol ester storage disease"[MeSH Terms] OR "cholesterol ester storage" OR "Wolman disease"[All Fields] OR "Wolmans Disease"[All Fields] OR "Wolman's Disease"[All Fields] OR "Lysosomal acid lipase"[All Fields] OR "Acid Lipase Deficiency"[All Fields] OR "Familial Xanthomatosis"[All Fields] OR "LIPA deficiency"[All Fields] OR "LAL Deficiency"[All Fields]) AND ("child"[MeSH Terms] OR "child"[Title/Abstract] OR "children"[Title/Abstract] OR "childhood"[Title/Abstract] OR "child, preschool"[MeSH Terms] OR "preschool"[All Fields] OR "preschools"[All Fields] OR "pediatrics"[MeSH Terms] OR "pediatrics"[Title/Abstract] OR "pediatric"[Title/Abstract] OR "paediatrics"[Title/Abstract] OR "paediatric"[Title/Abstract] OR "infancy"[All Fields] OR "infant"[MeSH Terms] OR "infant"[All Fields] OR "infants"[All Fields] OR "adolescent"[MeSH Terms] OR "adolescent"[All Fields] OR "adolescents"[All Fields] OR "adolescence"[All Fields] OR "youth"[All Fields] OR "youths"[All Fields] OR "teenage"[All Fields] OR "teenager"[All Fields] OR "teenagers"[All Fields] OR "teen"[All Fields] OR "teens"[All Fields])) |
| Scopus | TITLE-ABS-KEY("cholesterol ester storage" OR "Wolman disease" OR "Wolmans Disease" OR "Wolman's Disease" OR "Lysosomal acid lipase" OR "Acid Lipase Deficiency" OR "Familial Xanthomatosis" OR "LIPA deficiency" OR "LAL Deficiency" OR "LIPA mutation") AND TITLE-ABS-KEY("child" OR "children" OR "childhood" OR "preschool" OR "preschools" OR "pediatrics" OR "pediatric" OR "paediatrics" OR "paediatric" OR "infancy" OR "infant" OR "infants" OR "adolescent" OR "adolescents" OR "adolescence" OR "youth" OR "youths" OR "teenage" OR "teenager" OR "teenagers" OR "teen" OR "teens") AND (LIMIT-TO(DOCTYPE,"ar")) |
| Web of Science | TS=("cholesterol ester storage" OR "Wolman disease" OR "Wolmans Disease" OR "Wolman's Disease" OR "Lysosomal acid lipase" OR "Acid Lipase Deficiency" OR "Familial Xanthomatosis" OR "LIPA deficiency" OR "LAL Deficiency" OR "LIPA mutation") AND ("child" OR "children" OR "childhood" OR "preschool" OR "preschools" OR "pediatrics" OR "pediatric" OR "paediatrics" OR "paediatric" OR "infancy" OR "infant" OR "infants" OR "adolescent" OR "adolescents" OR "adolescence" OR "youth" OR "youths" OR "teenage" OR "teenager" OR "teenagers" OR "teen" OR "teens") |
| GREY LITERATURE | |
| Google Scholar | ("cholesterol ester storage" OR "Wolman disease" OR "Lysosomal acid lipase") AND ("child" OR "children" OR "childhood" OR "adolescent" OR "adolescents" OR "adolescence") |
| OpenGrey | ("cholesterol ester storage" OR "Wolman disease" OR "Wolmans Disease" OR "Wolman's Disease" OR "Lysosomal acid lipase" OR "Acid Lipase Deficiency" OR "Familial Xanthomatosis" OR "LIPA deficiency" OR "LAL Deficiency" OR "LIPA mutation") AND ("child" OR "children" OR "childhood" OR "preschool" OR "preschools" OR "pediatrics" OR "pediatric" OR "paediatrics" OR "paediatric" OR "infancy" OR "infant" OR "infants" OR "adolescent" OR "adolescents" OR "adolescence" OR "youth" OR "youths" OR "teenage" OR "teenager" OR "teenagers" OR "teen" OR "teens") |
| Proquest | noft("cholesterol ester storage" OR "Wolman disease" OR "Wolmans Disease" OR "Wolman's Disease" OR "Lysosomal acid lipase" OR "Acid Lipase Deficiency" OR "Familial Xanthomatosis" OR "LIPA deficiency" OR "LAL Deficiency" OR "LIPA mutation") AND noft("child" OR "children" OR "childhood" OR "preschool" OR "preschools" OR "pediatrics" OR "pediatric" OR "paediatrics" OR "paediatric" OR "infancy" OR "infant" OR "infants" OR "adolescent" OR "adolescents" OR "adolescence" OR "youth" OR "youths" OR "teenage" OR "teenager" OR "teenagers" OR "teen" OR "teens") |
